# Supplementary material for: Endometrial Cancer Staging: Is There Value in ADC?
Source: MDPI journal article supplement (doi:10.3390/jpm13050728), 2023-04-25
Supplement: s1 [file s1]

**Table S1.** MRI scanning protocol.

| Sequence            | TR/TE (ms) | Slice/Increment (mm) | Matrix    | Flip angle (degrees) | FOV (mm) | b-values (s/mm2) |
|---------------------|------------|----------------------|-----------|----------------------|----------|------------------|
| T2W axial pelvis    | 8470/99    | 5.0/1.0              | 448 × 402 | 150                  | 340      |                  |
| T1W axial           | 571/11     | 5.0/0.1              | 384 × 306 | 150                  | 340      |                  |
| T2W sagittal        | 4311/101   | 3.5/0.7              | 320 × 320 | 150                  | 220      |                  |
| T2W axial oblique   | 4160/101   | 3.5/0.7              | 320 × 320 | 150                  | 220      |                  |
| T2W coronal oblique | 3100/101   | 3.5/0.3              | 320 × 320 | 150                  | 230      |                  |
| T2W abdomen         | 3050/125   | 6.0/1.8              | 256 × 256 | 150                  | 370      |                  |
| DWI                 | 4101/84    | 3.5/0.7              | 102 × 102 |                      | 220      | 50, 500, 1000    |
| DCE                 | 5.86/2.74  | 2.5/0.5              | 320 × 280 | 10                   | 300      |                  |
